# Supplementary material for: Kappa-alpha plot derived structural alphabet and BLOSUM-like substitution matrix for rapid search of protein structure database
Source: PubMed Central journal article supplement (PMC1868941; doi:10.1186/gb-2007-8-3-r31), 2007-03-03
Supplement: gb-2007-8-3-r31-S4.pdf [file gb-2007-8-3-r31-S4.pdf]

**Additional Data File 4:** The root mean square derivation between x-ray structures and reconstructing structures using 23 representative segments on 38 proteins selected from the set SCOP516

| PDB code | Number of residues | SCOP family name | RMSD (Å) |
|----------|--------------------|------------------|----------|
| 1VD2-A   | 89                 | d.15.2.2         | 0.63     |
| 1T1V-A   | 93                 | c.47.1.14        | 1.10     |
| 1VB7-A   | 94                 | b.36.1.1         | 0.83     |
| 1SQ2-N   | 113                | b.1.1.1          | 0.93     |
| 1RYU-A   | 120                | a.4.3.1          | 0.73     |
| 1OZY-A   | 121                | a.133.1.2        | 0.97     |
| 1T2S-A   | 123                | b.34.14.1        | 0.81     |
| 1S28-A   | 132                | d.198.1.1        | 0.58     |
| 1TTW-A   | 138                | d.198.1.1        | 0.77     |
| 1WMU-A   | 141                | a.1.1.2          | 0.66     |
| 1UFG-A   | 151                | b.1.16.1         | 1.05     |
| 1TO4-A   | 156                | b.1.8.1          | 1.02     |
| 1VL7-A   | 157                | b.45.1.1         | 1.39     |
| 1S3Z-A   | 165                | d.108.1.1        | 0.70     |
| 1PM1-X   | 180                | b.60.1.1         | 1.01     |
| 1SY1-A   | 184                | b.60.1.1         | 1.34     |
| 1ULI-B   | 187                | d.17.4.4         | 0.96     |
| 1S6I-A   | 188                | a.39.1.5         | 0.99     |
| 1T4W-A   | 196                | b.2.5.2          | 0.85     |
| 1TEV-A   | 196                | c.37.1.1         | 0.69     |
| 1X9G-A   | 200                | c.33.1.3         | 0.94     |
| 1RO5-A   | 201                | d.108.1.3        | 0.62     |
| 1PZS-A   | 208                | b.1.8.1          | 0.83     |
| 1V9K-A   | 228                | d.265.1.3        | 0.89     |
| 1VL1-A   | 232                | c.124.1.1        | 0.98     |
| 1UD9-A   | 245                | d.131.1.2        | 0.73     |
| 1QYR-A   | 252                | c.66.1.24        | 0.74     |
| 1T8P-A   | 267                | c.60.1.1         | 0.83     |
| 1T6L-A   | 290                | d.131.1.2        | 0.97     |
| 1TUG-A   | 310                | c.78.1.1         | 0.79     |
| 1J2G-A   | 319                | d.96.1.4         | 0.74     |
| 1Q5M-A   | 322                | c.1.7.1          | 0.81     |
| 1SYY-A   | 346                | a.25.1.2         | 0.63     |
| 1U0M-A   | 382                | c.95.1.2         | 0.94     |
| 1TQY-B   | 415                | c.95.1.1         | 0.65     |
| 1QWO-A   | 442                | c.60.1.2         | 0.81     |
| 1UKC-A   | 522                | c.69.1.17        | 1.03     |
| 1V02-A   | 565                | c.1.8.4          | 0.87     |
