# Supplementary material for: Kappa-alpha plot derived structural alphabet and BLOSUM-like substitution matrix for rapid search of protein structure database
Source: PubMed Central journal article supplement (PMC1868941; doi:10.1186/gb-2007-8-3-r31), 2007-03-03
Supplement: gb-2007-8-3-r31-S6.pdf [file gb-2007-8-3-r31-S6.pdf]

**Additional Data File 6:** The average precision of each program on 108 queries in SCOP-108

| SCOP id | SCOP sccs | length | number of members | 3D-BLAST | PSI-BLAST | CE   | MAMMOTH |
|---------|-----------|--------|-------------------|----------|-----------|------|---------|
| 1A8H_2  | c.26.1.1  | 89     | 5                 | 71%      | 80%       | 87%  | 91%     |
| 1AFWA2  | c.95.1.1  | 93     | 1                 | 67%      | 33%       | 70%  | 73%     |
| 1AJSA_  | c.67.1.1  | 94     | 42                | 88%      | 90%       | 86%  | 89%     |
| 1ATG_   | c.94.1.1  | 113    | 538               | 72%      | 21%       | 90%  | 89%     |
| 1AW1A_  | c.1.1.1   | 120    | 3                 | 100%     | 100%      | 100% | 100%    |
| 1B3RA1  | c.2.1.4   | 121    | 43                | 75%      | 83%       | 38%  | 56%     |
| 1B5EA_  | d.117.1.1 | 123    | 3                 | 100%     | 100%      | 100% | 100%    |
| 1BD3A_  | c.61.1.1  | 132    | 7                 | 63%      | 36%       | 97%  | 73%     |
| 1BG2_   | c.37.1.9  | 138    | 7                 | 58%      | 53%       | 53%  | 51%     |
| 1BGVA2  | c.58.1.1  | 141    | 68                | 100%     | 100%      | 100% | 100%    |
| 1BI5A1  | c.95.1.2  | 151    | 2                 | 50%      | 50%       | 58%  | 53%     |
| 1BU6O1  | c.55.1.4  | 156    | 12                | 50%      | 50%       | 50%  | 50%     |
| 1BWVS_  | d.73.1.1  | 157    | 4                 | 100%     | 100%      | 100% | 100%    |
| 1CCWA_  | c.23.6.1  | 163    | 3                 | 82%      | 80%       | 94%  | 100%    |
| 1CE7A_  | d.165.1.1 | 165    | 19                | 100%     | 100%      | 100% | 100%    |
| 1CJWA_  | d.108.1.1 | 180    | 28                | 97%      | 35%       | 77%  | 97%     |
| 1CP2A_  | c.37.1.10 | 184    | 28                | 54%      | 58%       | 68%  | 56%     |
| 1CPT_   | a.104.1.1 | 187    | 1                 | 100%     | 100%      | 100% | 100%    |
| 1D3GA_  | c.1.4.1   | 188    | 48                | 65%      | 51%       | 48%  | 55%     |
| 1DBFA_  | d.79.1.2  | 196    | 2                 | 100%     | 100%      | 100% | 100%    |
| 1DBQA_  | c.93.1.1  | 196    | 38                | 95%      | 65%       | 94%  | 84%     |
| 1DI0A_  | c.16.1.1  | 200    | 5                 | 100%     | 100%      | 100% | 86%     |
| 1DK5A_  | a.65.1.1  | 201    | 1                 | 93%      | 100%      | 100% | 100%    |
| 1DPGA2  | d.81.1.5  | 206    | 61                | 67%      | 67%       | 100% | 100%    |
| 1DSSG2  | d.81.1.1  | 208    | 12                | 93%      | 73%       | 100% | 100%    |
| 1DZKA_  | b.60.1.1  | 215    | 1                 | 90%      | 79%       | 100% | 99%     |
| 1E0TA2  | c.1.12.1  | 228    | 3                 | 100%     | 100%      | 100% | 100%    |
| 1E0TA3  | c.49.1.1  | 232    | 3                 | 100%     | 100%      | 100% | 100%    |
| 1E4FT1  | c.55.1.1  | 245    | 14                | 9%       | 6%        | 24%  | 6%      |
| 1E6TA_  | d.85.1.1  | 252    | 3                 | 100%     | 70%       | 100% | 100%    |
| 1EAL_   | b.60.1.2  | 261    | 3                 | 98%      | 100%      | 100% | 100%    |
| 1EJ8A_  | b.1.8.1   | 267    | 5                 | 100%     | 42%       | 94%  | 50%     |
| 1EKXA1  | c.78.1.1  | 290    | 14                | 47%      | 47%       | 48%  | 47%     |
| 1EP3B1  | b.43.4.2  | 297    | 4                 | 77%      | 8%        | 95%  | 96%     |
| 1EU3A1  | b.40.2.2  | 310    | 15                | 68%      | 52%       | 100% | 74%     |
| 1EUAA_  | c.1.10.1  | 313    | 55                | 16%      | 6%        | 17%  | 18%     |
| 1EUHA_  | c.82.1.1  | 319    | 2                 | 100%     | 100%      | 100% | 100%    |
| 1EXQA_  | c.55.3.2  | 322    | 18                | 100%     | 100%      | 95%  | 100%    |
| 1EYZA3  | d.142.1.2 | 346    | 13                | 86%      | 78%       | 81%  | 96%     |
| 1F3MC_  | d.144.1.1 | 382    | 4                 | 100%     | 100%      | 100% | 100%    |
| 1F4PA_  | c.23.5.1  | 415    | 22                | 77%      | 85%       | 74%  | 84%     |
| 1F86A_  | b.3.4.1   | 415    | 1                 | 100%     | 100%      | 100% | 100%    |
| 1FC4A_  | c.67.1.4  | 422    | 2                 | 57%      | 61%       | 64%  | 58%     |
| 1FECA3  | d.87.1.1  | 442    | 6                 | 85%      | 83%       | 95%  | 90%     |
| 1FJEB2  | d.58.7.1  | 477    | 19                | 83%      | 100%      | 95%  | 93%     |
| 1FSOA_  | b.1.1.5   | 522    | 10                | 99%      | 88%       | 100% | 99%     |
| 1FXOA_  | c.68.1.6  | 542    | 48                | 100%     | 100%      | 100% | 100%    |
| 1G3NC1  | a.74.1.1  | 544    | 3                 | 43%      | 34%       | 50%  | 74%     |
| 1G5TA_  | c.37.1.11 | 565    | 11                | 34%      | 13%       | 67%  | 46%     |
| 1G7SA2  | b.43.3.1  | 89     | 5                 | 96%      | 9%        | 100% | 94%     |
| 1GEHA1  | c.1.14.1  | 93     | 1                 | 100%     | 100%      | 100% | 100%    |
| 1GGXA_  | d.22.1.1  | 94     | 42                | 100%     | 100%      | 100% | 100%    |
| 1GNIA3  | a.126.1.1 | 113    | 538               | 86%      | 100%      | 100% | 96%     |
| 1GR3A_  | b.22.1.1  | 120    | 3                 | 100%     | 22%       | 99%  | 90%     |
| 1GSOA2  | c.30.1.1  | 121    | 43                | 44%      | 17%       | 70%  | 61%     |
| 1GTMA1  | c.2.1.7   | 123    | 3                 | 74%      | 47%       | 76%  | 86%     |
| 1H4VB2  | d.104.1.1 | 132    | 7                 | 65%      | 41%       | 92%  | 57%     |
| 1H8VA_  | b.29.1.11 | 138    | 7                 | 99%      | 45%       | 100% | 100%    |
| 1HQSA_  | c.77.1.1  | 141    | 68                | 100%     | 100%      | 100% | 100%    |
| 1HR6A2  | d.185.1.1 | 151    | 2                 | 87%      | 44%       | 100% | 98%     |
| 1HYHA2  | d.162.1.1 | 156    | 12                | 100%     | 100%      | 100% | 100%    |

|        |           |     |    |      |      |      |      |
|--------|-----------|-----|----|------|------|------|------|
| 1IIRA1 | b.1.2.1   | 157 | 4  | 3%   | 2%   | 7%   | 5%   |
| 1IDSA2 | d.44.1.1  | 163 | 3  | 100% | 100% | 100% | 100% |
| 1IE9A_ | a.123.1.1 | 165 | 19 | 100% | 100% | 100% | 100% |
| 1IG8A1 | c.55.1.3  | 180 | 28 | 50%  | 50%  | 52%  | 64%  |
| 1IH7A1 | c.55.3.5  | 184 | 28 | 53%  | 46%  | 85%  | 88%  |
| 1IS8A_ | d.96.1.1  | 187 | 1  | 100% | 100% | 100% | 100% |
| 1J7NA3 | d.166.1.1 | 188 | 48 | 67%  | 12%  | 67%  | 67%  |
| 1JB7A2 | b.40.4.3  | 196 | 2  | 30%  | 10%  | 59%  | 50%  |
| 1JJWA_ | d.153.1.4 | 196 | 38 | 100% | 68%  | 100% | 100% |
| 1HRHA1 | c.55.3.1  | 200 | 5  | 80%  | 66%  | 73%  | 73%  |
| 1JSWA_ | a.127.1.1 | 201 | 1  | 100% | 100% | 100% | 100% |
| 1JZ8A4 | b.30.1.1  | 206 | 61 | 100% | 100% | 100% | 100% |
| 1K0IA1 | c.3.1.2   | 208 | 12 | 23%  | 32%  | 24%  | 34%  |
| 1K94A_ | a.39.1.7  | 215 | 1  | 100% | 100% | 100% | 100% |
| 1K9SA_ | c.56.2.1  | 228 | 3  | 100% | 72%  | 100% | 100% |
| 1KBVA2 | b.6.1.3   | 232 | 3  | 82%  | 18%  | 98%  | 89%  |
| 1KID_  | c.8.5.1   | 245 | 14 | 100% | 100% | 100% | 100% |
| 1KYGA_ | c.47.1.10 | 252 | 3  | 74%  | 70%  | 98%  | 100% |
| 1MTYD_ | a.25.1.2  | 261 | 3  | 64%  | 17%  | 75%  | 92%  |
| 1KFWA1 | c.1.8.5   | 267 | 5  | 87%  | 79%  | 99%  | 91%  |
| 1OELA1 | a.129.1.1 | 290 | 14 | 100% | 100% | 100% | 100% |
| 1ONC_  | d.5.1.1   | 297 | 4  | 100% | 100% | 100% | 100% |
| 1PBGA_ | c.1.8.4   | 310 | 15 | 100% | 100% | 100% | 100% |
| 1PINA2 | d.26.1.1  | 313 | 55 | 22%  | 30%  | 29%  | 34%  |
| 1QAXA2 | d.179.1.1 | 319 | 2  | 100% | 100% | 100% | 100% |
| 1QDEA_ | c.37.1.13 | 322 | 18 | 30%  | 23%  | 31%  | 49%  |
| 1QDLB_ | c.23.16.1 | 346 | 13 | 100% | 100% | 100% | 100% |
| 1QE0A1 | c.51.1.1  | 382 | 4  | 100% | 93%  | 100% | 100% |
| 1QFJA2 | c.25.1.1  | 415 | 22 | 75%  | 83%  | 60%  | 61%  |
| 1QGNA_ | c.67.1.3  | 415 | 1  | 73%  | 70%  | 82%  | 81%  |
| 1QGWC_ | a.1.1.3   | 422 | 2  | 100% | 100% | 100% | 100% |
| 1QKKA_ | c.23.1.1  | 442 | 6  | 81%  | 99%  | 98%  | 91%  |
| 1QMGA2 | c.2.1.6   | 477 | 19 | 12%  | 24%  | 79%  | 71%  |
| 1QOPB_ | c.79.1.1  | 522 | 10 | 93%  | 93%  | 100% | 100% |
| 1QORA2 | c.2.1.1   | 542 | 48 | 100% | 100% | 100% | 100% |
| 1QQ4A_ | b.47.1.1  | 544 | 3  | 69%  | 63%  | 65%  | 67%  |
| 1SMVA_ | b.10.1.2  | 565 | 11 | 100% | 100% | 98%  | 100% |
| 1TRB_2 | c.3.1.5   | 415 | 1  | 54%  | 61%  | 59%  | 62%  |
| 1VCAA2 | b.1.1.4   | 422 | 2  | 9%   | 23%  | 45%  | 23%  |
| 1VDRA_ | c.71.1.1  | 442 | 6  | 100% | 100% | 100% | 100% |
| 1GGWA_ | a.39.1.5  | 477 | 19 | 75%  | 83%  | 67%  | 47%  |
| 1ZIN_1 | c.37.1.1  | 522 | 10 | 62%  | 69%  | 70%  | 60%  |
| 2CMD_1 | c.2.1.5   | 542 | 48 | 99%  | 99%  | 100% | 83%  |
| 2SHPA1 | c.45.1.2  | 544 | 3  | 100% | 100% | 100% | 100% |
| 1CQDA_ | d.3.1.1   | 565 | 11 | 96%  | 98%  | 96%  | 97%  |
| 3GRX_  | c.47.1.1  | 589 | 5  | 27%  | 49%  | 34%  | 35%  |
| 3PMGA1 | c.84.1.1  | 589 | 5  | 34%  | 33%  | 63%  | 41%  |
